# Supplementary material for: Molecular design and selection of 1,2,5-oxadiazole derivatives as high-energy-density materials
Source: Royal Society of Chemistry journal article supplement (doi:10.1039/c9nj02728a), 2019-01-01
Supplement: c9nj02728a1.pdf [file c9nj02728a1.pdf]

## Supporting Information

### 1. Computational methods

Gaussian 03 program [1] was employed to calculate the frontier molecular orbitals, heats of formation, energetic properties and bond dissociation energies of the compounds. All the calculations were carried out by density functional theory (DFT) method at B3LYP/6-311G(*d,p*) level on. Gas-phase heats of formation ( $\Delta H_{f,\text{gas}}$ ) of were predicted by the following isodesmic reactions (Scheme 1) combined with (equations 1 and 2)[2-4].

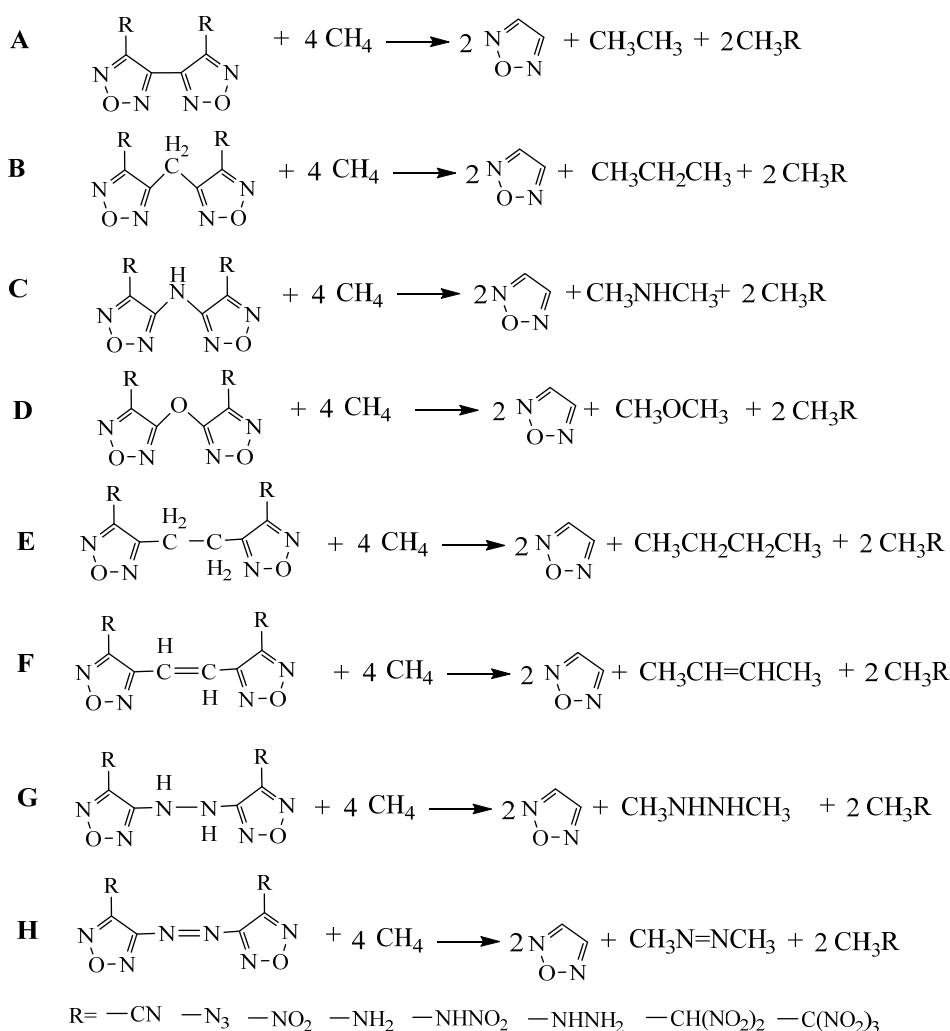

**Scheme 1** The designed isodesmic reactions for each series of compounds

$$\Delta H_{298\text{K}} = \sum \Delta H_{f,p} - \sum \Delta H_{f,R} \quad (1)$$

$$\Delta H_{298\text{K}} = \Delta E_{298\text{K}} + \Delta(PV) = \Delta E_0 + \Delta ZPE + \Delta H_T + \Delta nRT \quad (2)$$

$\Delta H_{f,p}$  and  $\Delta H_{f,R}$  were presented as heats of formation of the products and reactants;  $\Delta E_0$  were energy changes between products and reactants;  $\Delta ZPE$  were difference between the zero-point energy (ZPE) of products and reactants;  $\Delta H_T$  were thermal correction from 0 to 298 K;  $n$  was the number of the energetic groups;  $\Delta(PV)$  equals to  $\Delta nRT$ .

Atomization reactions ( $C_aH_bN_c \rightarrow aC(g)+bH(g)+cN(g)$ ) were employed to calculated the  $\Delta H_{f,gas}$  of these unknown compounds ( $CH_3NF_2$ ,  $CH_3NHNO_2$ ,  $CH_3N_3$ ,  $CH_3NHNHCH_3$ ,  $CH_3N=NCH_3$ ) at CBS-Q level.[5] Also, HOFs of compounds  $CH_3CH(NO_2)_2$  and  $CH_3C(NO_2)_3$  were calculated via isodesmic reactions:

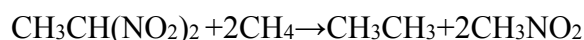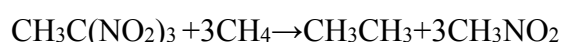

The related parameters were summarized in Table 1.

**Table 1. Calculated total energies ( $E_0$ ), zero-point energies (ZPE), thermal corrections ( $H_T$ ) and heats of formation (HOFs) of the reference compounds**

| Compound.                                       | $E_0$ (a.u.) <sup>a</sup> | ZPE (kJ mol <sup>-1</sup> ) <sup>a</sup> | $H_T$ (kJ mol <sup>-1</sup> ) <sup>a</sup> | $\Delta H_{f,gas}$ (kJ mol <sup>-1</sup> ) |
|-------------------------------------------------|---------------------------|------------------------------------------|--------------------------------------------|--------------------------------------------|
| NH <sub>3</sub>                                 | -56.576035                | 90.1                                     | 10.0                                       | -45.9 <sup>b</sup>                         |
| CH <sub>4</sub>                                 | -40.533748                | 117.0                                    | 10.0                                       | -74.6 <sup>b</sup>                         |
| CH <sub>3</sub> NHNH <sub>2</sub>               | -151.217035               | 213.0                                    | 14.3                                       | 94.5 <sup>b</sup>                          |
| CH <sub>3</sub> NF <sub>2</sub>                 | -294.298331               | 122.8                                    | 13.6                                       | -98.4 <sup>c</sup>                         |
| CH <sub>3</sub> NH <sub>2</sub>                 | -95.888444                | 167.6                                    | 11.4                                       | -23.5 <sup>b</sup>                         |
| CH <sub>3</sub> NHNO <sub>2</sub>               | -300.434462               | 176.5                                    | 16.0                                       | -8.5 <sup>c</sup>                          |
| CH <sub>3</sub> NO <sub>2</sub>                 | -245.081687               | 130.6                                    | 13.9                                       | -81.0 <sup>b</sup>                         |
| CH <sub>3</sub> CN                              | -132.793330               | 118.7                                    | 11.9                                       | 74.0 <sup>b</sup>                          |
| CH <sub>3</sub> N <sub>3</sub>                  | -204.148401               | 131.7                                    | 14.2                                       | 289.9 <sup>c</sup>                         |
| CH <sub>3</sub> CH <sub>3</sub>                 | -79.856261                | 195.3                                    | 11.6                                       | 84.0 <sup>b</sup>                          |
| CH <sub>3</sub> CH <sub>2</sub> CH <sub>3</sub> | -119.180686               | 270.4                                    | 14.4                                       | -104.7 <sup>b</sup>                        |

|                                                                                   |             |       |      |                     |
|-----------------------------------------------------------------------------------|-------------|-------|------|---------------------|
| CH <sub>3</sub> NHCH <sub>3</sub>                                                 | -135.695161 | 254.5 | 14.9 | -19.0 <sup>b</sup>  |
| CH <sub>3</sub> OCH <sub>3</sub>                                                  | -155.071921 | 208.2 | 13.8 | -184.1 <sup>b</sup> |
| CH <sub>3</sub> CH <sub>2</sub> CH <sub>2</sub> CH <sub>3</sub>                   | -158.504982 | 345.1 | 17.7 | -125.6 <sup>b</sup> |
| CH <sub>3</sub> CH=CHCH <sub>3</sub>                                              | -157.273161 | 282.0 | 16.9 | -10.7 <sup>b</sup>  |
| CH <sub>3</sub> NHNHCH <sub>3</sub>                                               | -190.535853 | 286.9 | 17.1 | 109.3 <sup>c</sup>  |
| CH <sub>3</sub> N=NCH <sub>3</sub>                                                | -189.328011 | 220.6 | 16.0 | 160.5 <sup>c</sup>  |
| CH <sub>3</sub> CH(NO <sub>2</sub> ) <sub>2</sub>                                 | -488.950712 | 212.3 | 22.8 | 81.8 <sup>d</sup>   |
| CH <sub>3</sub> C(NO <sub>2</sub> ) <sub>3</sub>                                  | -693.479196 | 215.6 | 29.3 | 105.1 <sup>d</sup>  |
|  | -262.112125 | 119.6 | 11.6 | 197.4 <sup>c</sup>  |

a, calculated at B3LYP/ 6-311G (d,p) level; b, obtained from <http://webbook.nist.gov>; c, calculated values were calculated at the CBS-Q level; d, obtained by isodesmic reaction.

Solid-phase HOFs ( $\Delta H_{f,solid}$ ) were calculated according to Hess's law since most of the energetic materials were in condensed phase (equation 3).[6]

$$\Delta H_{f,solid} = \Delta H_{f,gas} - \Delta H_{sub} \quad (3)$$

Where,  $\Delta H_{sub}$  is the heat of sublimation.  $\Delta H_{sub}$  is the sublimation enthalpy and can be calculated by the following empirical expression (equation 4).[7]

$$\Delta H_{sub} = aA^2 + b(\nu\sigma_{tot}^2)^{0.5} + c \quad (4)$$

where,  $a$ ,  $b$  and  $c$  were coefficients according to the reference;[8]  $A$  was the surface area of the 0.001 e bohr<sup>-3</sup> isosurface of electronic density of the molecule;  $\nu$  was the degree of balance between positive and negative potential on the isosurface;  $\sigma_{tot}^2$  was the measure of variability of the electrostatic potential on the molecular surface.

Kamlet-Jacobs equations (equation 5 and 6) were employed to calculate the detonation velocities ( $D$ ) and detonation pressures ( $P$ ) of the designed compounds.[9]

$$D = 1.01(N\bar{M}^{0.5}Q^{0.5})^{0.5}(1+1.3\rho) \quad (5)$$

$$P = 1.558\rho^2N\bar{M}^{0.5}Q^{0.5} \quad (6)$$

where,  $N$  was the mole of detonation gases per-gram explosive (mol g<sup>-1</sup>),  $\bar{M}$  was average molecular weight of these gases (g mol<sup>-1</sup>),  $Q$  was heat of detonation (cal g<sup>-1</sup>)

and  $\rho$  was the density. Also, accurate densities can be obtained by an improved equation (equation 7) proposed by Politzer et al.[10]

$$\rho = \beta_1 \left( \frac{M}{V} \right) + \beta_2 (v\sigma_{tot}^2) + \beta_3 \quad (7)$$

Where,  $\beta_1$ ,  $\beta_2$ , and  $\beta_3$  were coefficients,  $M$  was the molecular mass ( $\text{g mol}^{-1}$ ),  $V$  was the volume of a molecule ( $\text{m}^3 \text{mol}^{-1}$ ).

Finally, bond dissociation energies (BDEs) of the designed compounds were also predicted according to equation (8) and (9).

$$\text{BDE}_0(\text{A-B}) = E_0(\text{A}\cdot) + E_0(\text{B}\cdot) - E_0(\text{A-B}) \quad (8)$$

$$\text{BDE}(\text{A-B})_{\text{ZPE}} = \text{BDE}_0(\text{A-B}) + \Delta E_{\text{ZPE}} \quad (9)$$

where  $E_0(\text{A}\cdot)$ ,  $E_0(\text{B}\cdot)$  and  $E_0(\text{A-B})$  were the energy of  $\text{A}\cdot$ ,  $\text{B}\cdot$  and  $\text{A-B}$ ;  $\Delta E_{\text{ZPE}}$  was the difference between the  $\text{ZPE}$ s of the products and the reactants.

## 2. Data of $\Delta E_{\text{LUMO-HOMO}}$ , HOFs, detonation properties and BDEs

**Table 2 Calculated HOMO and LUMO energies (eV) and energy gaps**

**( $\Delta E_{\text{LUMO-HOMO}}$ ) of the designed compounds**

| <b>Compd.</b>                 | <b>A<sup>a</sup></b> | <b>A1</b> | <b>A2</b> | <b>A3</b> | <b>A4</b> | <b>A5</b> | <b>A6</b> | <b>A7</b> | <b>A8</b> |
|-------------------------------|----------------------|-----------|-----------|-----------|-----------|-----------|-----------|-----------|-----------|
| HOMO                          | -8.58                | -9.44     | -7.85     | -9.29     | -6.83     | -8.47     | -6.84     | -9.29     | -9.70     |
| LUMO                          | -2.59                | -3.52     | -2.81     | -3.67     | -2.23     | -3.41     | -2.35     | -3.63     | -4.18     |
| $\Delta E_{\text{HOMO-LUMO}}$ | 5.99                 | 5.92      | 5.04      | 5.62      | 4.60      | 5.06      | 4.49      | 5.66      | 5.52      |
| <b>Compd.</b>                 | <b>B<sup>a</sup></b> | <b>B1</b> | <b>B2</b> | <b>B3</b> | <b>B4</b> | <b>B5</b> | <b>B6</b> | <b>B7</b> | <b>B8</b> |
| HOMO                          | -8.86                | -9.39     | -7.78     | -9.32     | -6.85     | -8.62     | -6.89     | -9.34     | -9.77     |
| LUMO                          | -2.11                | -3.13     | -2.35     | -3.86     | -1.36     | -3.14     | -1.70     | -3.60     | -4.26     |
| $\Delta E_{\text{HOMO-LUMO}}$ | 6.75                 | 6.26      | 5.43      | 5.46      | 5.49      | 5.48      | 5.19      | 5.74      | 5.51      |
| <b>Compd.</b>                 | <b>C<sup>a</sup></b> | <b>C1</b> | <b>C2</b> | <b>C3</b> | <b>C4</b> | <b>C5</b> | <b>C6</b> | <b>C7</b> | <b>C8</b> |
| HOMO                          | -7.27                | -8.16     | -7.26     | -8.34     | -6.65     | -7.51     | -6.26     | -8.22     | -8.47     |
| LUMO                          | -2.04                | -2.92     | -2.29     | -4.05     | -1.69     | -3.00     | -1.18     | -3.77     | -4.44     |
| $\Delta E_{\text{HOMO-LUMO}}$ | 5.23                 | 5.24      | 4.97      | 4.29      | 4.96      | 4.51      | 5.08      | 4.45      | 4.03      |
| <b>Compd.</b>                 | <b>D<sup>a</sup></b> | <b>D1</b> | <b>D2</b> | <b>D3</b> | <b>D4</b> | <b>D5</b> | <b>D6</b> | <b>D7</b> | <b>D8</b> |
| HOMO                          | -8.21                | -9.12     | -7.83     | -9.35     | -7.11     | -8.44     | -6.85     | -8.94     | -9.43     |
| LUMO                          | -2.32                | -3.07     | -2.41     | -4.01     | -1.80     | -2.80     | -1.24     | -3.32     | -4.19     |
| $\Delta E_{\text{HOMO-LUMO}}$ | 5.89                 | 6.05      | 5.42      | 5.34      | 5.31      | 5.64      | 5.61      | 5.62      | 5.24      |
| <b>Compd.</b>                 | <b>E<sup>a</sup></b> | <b>E1</b> | <b>E2</b> | <b>E3</b> | <b>E4</b> | <b>E5</b> | <b>E6</b> | <b>E7</b> | <b>E8</b> |
| HOMO                          | -8.66                | -9.27     | -7.68     | -9.21     | -7.04     | -8.54     | -6.84     | -9.35     | -9.67     |

|                               |                      |           |           |           |           |           |           |           |           |
|-------------------------------|----------------------|-----------|-----------|-----------|-----------|-----------|-----------|-----------|-----------|
| LUMO                          | -1.68                | -2.94     | -2.12     | -3.71     | -1.17     | -2.63     | -0.98     | -3.50     | -4.13     |
| $\Delta E_{\text{HOMO-LUMO}}$ | 6.98                 | 6.33      | 5.56      | 5.50      | 5.87      | 5.91      | 5.86      | 5.85      | 5.54      |
| <b>Compd.</b>                 | <b>F<sup>a</sup></b> | <b>F1</b> | <b>F2</b> | <b>F3</b> | <b>F4</b> | <b>F5</b> | <b>F6</b> | <b>F7</b> | <b>F8</b> |
| HOMO                          | -7.47                | -8.30     | -7.30     | -8.33     | -6.80     | -7.69     | -6.40     | -8.41     | -8.50     |
| LUMO                          | -2.91                | -3.72     | -3.02     | -3.87     | -2.65     | -3.15     | -2.20     | -3.81     | -4.15     |
| $\Delta E_{\text{HOMO-LUMO}}$ | 4.56                 | 4.58      | 4.28      | 4.46      | 4.15      | 4.54      | 4.20      | 4.60      | 4.35      |
| <b>Compd.</b>                 | <b>G<sup>a</sup></b> | <b>G1</b> | <b>G2</b> | <b>G3</b> | <b>G4</b> | <b>G5</b> | <b>G6</b> | <b>G7</b> | <b>G8</b> |
| HOMO                          | -6.98                | -8.16     | -7.16     | -8.24     | -6.40     | -7.37     | -6.21     | -7.75     | -7.61     |
| LUMO                          | -1.66                | -2.99     | -2.15     | -3.85     | -1.24     | -2.79     | -0.84     | -3.45     | -4.22     |
| $\Delta E_{\text{HOMO-LUMO}}$ | 5.32                 | 5.17      | 5.01      | 4.39      | 5.16      | 4.58      | 5.37      | 4.30      | 3.39      |
| <b>Compd.</b>                 | <b>H<sup>a</sup></b> | <b>H1</b> | <b>H2</b> | <b>H3</b> | <b>H4</b> | <b>H5</b> | <b>H6</b> | <b>H7</b> | <b>H8</b> |
| HOMO                          | -7.79                | -8.62     | -7.78     | -8.65     | -7.06     | -8.75     | -6.88     | -8.91     | -8.92     |
| LUMO                          | -3.99                | -4.83     | -4.04     | -4.54     | -3.71     | -4.65     | -2.94     | -5.02     | -4.93     |
| $\Delta E_{\text{HOMO-LUMO}}$ | 3.80                 | 3.79      | 3.74      | 4.11      | 3.35      | 4.10      | 3.94      | 3.89      | 3.99      |

<sup>a</sup>A-H stand for the unsubstituted compounds.

**Table 3. Calculated total energy ( $E_0$ ), thermal correction ( $H_T$ ), zero point energy (ZPE), molecular properties and heat of formation ( $\Delta H_f$ ) of the designed compounds**

| Compd. | $E_0$ (a.u)  | ZPE<br>(kJ<br>mol <sup>-1</sup> ) | $H_T$<br>(kJ mol <sup>-1</sup> ) | $\Delta H_{f, \text{gas}}$<br>(kJ<br>mol <sup>-1</sup> ) | $A$<br>(Å <sup>2</sup> ) | $\nu$ | $\sigma_{\text{tot}}^2$<br>(kcal<br>mol <sup>-1</sup> ) <sup>2</sup> | $\Delta H_{\text{sub}}$<br>(kJ<br>mol <sup>-1</sup> ) | $\Delta H_{f, \text{solid}}$<br>(kJ<br>mol <sup>-1</sup> ) |
|--------|--------------|-----------------------------------|----------------------------------|----------------------------------------------------------|--------------------------|-------|----------------------------------------------------------------------|-------------------------------------------------------|------------------------------------------------------------|
| A1     | -707.523968  | 180.1                             | 30.0                             | 934.4                                                    | 195.2                    | 0.198 | 174.9                                                                | 95.6                                                  | 838.8                                                      |
| A2     | -850.266702  | 204.7                             | 34.7                             | 1279.3                                                   | 212.5                    | 0.211 | 99.0                                                                 | 94.5                                                  | 1184.8                                                     |
| A3     | -932.078535  | 199.3                             | 32.5                             | 676.4                                                    | 203.6                    | 0.113 | 151.3                                                                | 87.3                                                  | 589.1                                                      |
| A4     | -633.791677  | 274.0                             | 26.1                             | 529.1                                                    | 173.5                    | 0.202 | 202.7                                                                | 90.3                                                  | 438.8                                                      |
| A5     | -1042.825431 | 288.2                             | 41.1                             | 714.4                                                    | 230.3                    | 0.179 | 175.1                                                                | 110.4                                                 | 604.0                                                      |
| A6     | -744.453624  | 367.7                             | 35.8                             | 759.4                                                    | 205.0                    | 0.229 | 118.7                                                                | 95.4                                                  | 664.0                                                      |
| A7     | -1419.837630 | 362.0                             | 54.9                             | 950.7                                                    | 282.6                    | 0.092 | 198.1                                                                | 131.2                                                 | 819.5                                                      |

|    |              |       |      |        |       |       |       |       |        |
|----|--------------|-------|------|--------|-------|-------|-------|-------|--------|
| A8 | -1828.871097 | 365.9 | 69.0 | 1057.4 | 317.8 | 0.076 | 80.1  | 142.3 | 915.1  |
| B1 | -746.857127  | 255.1 | 33.6 | 723.4  | 217.2 | 0.163 | 192.5 | 103.8 | 619.6  |
| B2 | -889.589149  | 279.4 | 38.4 | 1096.3 | 227.8 | 0.163 | 190.3 | 108.9 | 987.4  |
| B3 | -971.424374  | 275.7 | 37.6 | 435.1  | 219.4 | 0.144 | 155.9 | 98.9  | 336.2  |
| B4 | -673.103963  | 351.2 | 32.4 | 377.9  | 197.4 | 0.199 | 250.4 | 104.7 | 273.2  |
| B5 | -1082.155342 | 365.7 | 43.4 | 513.1  | 249.9 | 0.165 | 223.4 | 124.1 | 389.0  |
| B6 | -783.763873  | 442.7 | 38.3 | 607.5  | 224.3 | 0.250 | 202.3 | 117.8 | 489.7  |
| B7 | -1459.172744 | 437.2 | 58.5 | 734.8  | 298.1 | 0.089 | 150.1 | 137.0 | 597.8  |
| B8 | -1868.201178 | 440.8 | 72.8 | 854.6  | 333.6 | 0.067 | 119.2 | 156.3 | 698.3  |
| C1 | -762.825067  | 221.4 | 34.1 | 2226.3 | 213.6 | 0.122 | 215.9 | 98.9  | 2127.4 |
| C2 | -905.638624  | 249.5 | 38.1 | 2388.0 | 232.0 | 0.199 | 129.0 | 107.6 | 2280.4 |
| C3 | -987.461750  | 245.5 | 37.0 | 1758.0 | 214.4 | 0.127 | 176.5 | 96.5  | 1661.5 |
| C4 | -689.150512  | 324.3 | 30.4 | 1678.6 | 189.9 | 0.175 | 275.6 | 100.7 | 1577.9 |
| C5 | -1098.192957 | 335.3 | 43.1 | 1835.5 | 240.9 | 0.115 | 211.6 | 111.3 | 1724.2 |
| C6 | -799.806462  | 415.1 | 36.7 | 1918.4 | 216.9 | 0.224 | 266.8 | 118.4 | 1800.0 |
| C7 | -1475.207905 | 406.8 | 57.8 | 2063.2 | 288.1 | 0.095 | 193.4 | 134.8 | 1928.4 |
| C8 | -1884.241465 | 411.5 | 71.8 | 2170.4 | 330.2 | 0.077 | 144.3 | 157.3 | 2013.1 |
| D1 | -782.672946  | 187.6 | 33.6 | 837.3  | 213.0 | 0.185 | 119.1 | 95.5  | 741.8  |
| D2 | -925.487852  | 216.0 | 37.4 | 995.7  | 230.4 | 0.222 | 87.3  | 102.2 | 893.5  |
| D3 | -1007.302416 | 211.2 | 36.9 | 387.9  | 213.7 | 0.141 | 145.1 | 94.7  | 293.2  |
| D4 | -709.001384  | 289.3 | 30.3 | 281.1  | 187.2 | 0.184 | 225.6 | 96.1  | 185.0  |
| D5 | -1118.039653 | 301.5 | 42.6 | 449.7  | 238.2 | 0.137 | 220.6 | 113.8 | 335.9  |

|    |              |       |      |        |       |       |       |       |        |
|----|--------------|-------|------|--------|-------|-------|-------|-------|--------|
| D6 | -819.651969  | 379.7 | 37.0 | 534.9  | 216.8 | 0.213 | 235.3 | 113.8 | 421.1  |
| D7 | -1494.998318 | 374.4 | 41.4 | 810.7  | 285.4 | 0.119 | 215.4 | 138.4 | 672.3  |
| D8 | -1904.088957 | 376.0 | 72.3 | 781.8  | 332.2 | 0.065 | 98.5  | 153.2 | 628.6  |
| E1 | -786.188013  | 329.6 | 37.4 | 685.5  | 239.1 | 0.204 | 156.9 | 115.4 | 570.1  |
| E2 | -928.931862  | 354.2 | 42.2 | 1027.6 | 259.6 | 0.248 | 85.2  | 119.5 | 908.1  |
| E3 | -1010.753196 | 349.7 | 41.5 | 402.2  | 241.8 | 0.168 | 147.7 | 112.2 | 290.0  |
| E4 | -712.435411  | 426.9 | 35.5 | 339.0  | 219.2 | 0.216 | 214.4 | 113.1 | 225.9  |
| E5 | -1121.486507 | 440.6 | 47.1 | 474.8  | 271.1 | 0.131 | 166.7 | 126.8 | 348.0  |
| E6 | -823.093973  | 518.5 | 41.6 | 572.5  | 246.8 | 0.228 | 254.0 | 133.1 | 439.4  |
| E7 | -1498.491914 | 510.5 | 62.7 | 726.8  | 331.2 | 0.073 | 257.2 | 164.9 | 561.9  |
| E8 | -1907.534256 | 515.4 | 76.7 | 811.1  | 363.8 | 0.070 | 112.7 | 179.7 | 631.4  |
| F1 | -784.957264  | 268.5 | 36.0 | 799.0  | 233.7 | 0.222 | 129.8 | 110.5 | 688.5  |
| F2 | -927.703032  | 293.0 | 40.8 | 1136.0 | 254.4 | 0.246 | 76.5  | 114.7 | 1021.3 |
| F3 | -1009.520742 | 288.3 | 40.5 | 520.3  | 237.5 | 0.178 | 125.8 | 108.1 | 412.2  |
| F4 | -711.207065  | 365.5 | 34.3 | 446.1  | 214.4 | 0.177 | 252.5 | 110.0 | 336.1  |
| F5 | -1120.254607 | 379.1 | 46.0 | 591.2  | 214.4 | 0.177 | 252.5 | 110.0 | 481.2  |
| F6 | -821.866135  | 457.8 | 40.2 | 678.7  | 242.0 | 0.218 | 251.6 | 129.0 | 549.7  |
| F7 | -1497.258880 | 448.4 | 62.0 | 846.0  | 328.2 | 0.071 | 251.5 | 162.0 | 684.0  |
| F8 | -1906.300490 | 453.3 | 75.7 | 932.0  | 361.6 | 0.073 | 98.0  | 177.0 | 755.0  |
| G1 | -818.232494  | 268.7 | 36.9 | 882.1  | 229.6 | 0.120 | 256.7 | 109.7 | 772.4  |
| G2 | -960.975337  | 293.7 | 41.5 | 1227.0 | 250.6 | 0.219 | 166.8 | 124.4 | 1102.6 |
| G3 | -1042.806078 | 289.7 | 40.3 | 576.9  | 231.8 | 0.133 | 158.5 | 104.2 | 472.7  |

|    |              |       |      |        |       |       |       |       |        |
|----|--------------|-------|------|--------|-------|-------|-------|-------|--------|
| G4 | -744.475826  | 367.0 | 32.1 | 544.4  | 210.8 | 0.193 | 244.7 | 109.5 | 434.9  |
| G5 | -1153.534702 | 381.5 | 45.6 | 662.4  | 258.6 | 0.126 | 198.2 | 121.7 | 540.7  |
| G6 | -855.145071  | 460.0 | 40.0 | 753.0  | 234.5 | 0.232 | 257.3 | 127.2 | 625.8  |
| G7 | -1530.526163 | 448.5 | 60.4 | 947.4  | 329.7 | 0.045 | 383.3 | 162.6 | 784.8  |
| G8 | -1939.578857 | 454.7 | 73.2 | 1004.6 | 359.4 | 0.062 | 118.6 | 175.5 | 829.1  |
| H1 | -816.982887  | 202.7 | 33.3 | 1040.7 | 227.2 | 0.205 | 157.7 | 109.4 | 931.3  |
| H2 | -959.729786  | 227.1 | 38.1 | 1374.6 | 247.6 | 0.247 | 92.0  | 113.9 | 1260.7 |
| H3 | -1041.539893 | 222.8 | 39.7 | 781.2  | 234.1 | 0.130 | 150.4 | 104.2 | 677.0  |
| H4 | -743.248622  | 300.0 | 33.6 | 648.3  | 206.5 | 0.187 | 212.3 | 103.6 | 544.7  |
| H5 | -1152.213329 | 323.0 | 40.3 | 1015.3 | 256.2 | 0.162 | 224.8 | 127.5 | 887.8  |
| H6 | -853.894844  | 391.3 | 39.8 | 914.0  | 236.9 | 0.214 | 247.7 | 125.4 | 788.6  |
| H7 | -1529.293439 | 383.9 | 61.1 | 1067.4 | 324.3 | 0.085 | 190.0 | 157.7 | 909.7  |
| H8 | -1938.331638 | 388.5 | 74.8 | 1162.0 | 357.8 | 0.072 | 95.0  | 173.6 | 988.4  |

**Table 4. Predicted densities ( $\rho$ ), heats of detonation ( $Q$ ), detonation velocities ( $D$ ) and detonation pressures ( $P$ ) of the designed compounds**

| Compound | OB      | $\rho$ (g cm <sup>-3</sup> ) | $Q$ (cal g <sup>-1</sup> ) | $D$ (km s <sup>-1</sup> ) | $P$ (GPa) |
|----------|---------|------------------------------|----------------------------|---------------------------|-----------|
| A1       | -85.11  | 1.64                         | 1566.6                     | 6.90                      | 20.0      |
| A2       | -43.64  | 1.74                         | 1714.6                     | 8.24                      | 29.5      |
| A3       | -14.04  | 1.88                         | 1855.0                     | 9.07                      | 37.5      |
| A4       | -76.19  | 1.63                         | 1312.3                     | 7.24                      | 21.9      |
| A5       | -18.60  | 1.85                         | 1694.9                     | 8.95                      | 36.1      |
| A6       | -72.73  | 1.60                         | 1385.3                     | 7.68                      | 24.3      |
| A7       | -13.87  | 1.89                         | 1956.3                     | 9.33                      | 39.7      |
| A8       | 7.34    | 2.02                         | 1795.9                     | 9.71                      | 44.7      |
| B1       | -102.97 | 1.57                         | 1252.0                     | 6.25                      | 15.9      |



|    |         |      |        |      |      |
|----|---------|------|--------|------|------|
| B2 | -61.54  | 1.67 | 1456.5 | 7.57 | 24.2 |
| B3 | -33.06  | 1.80 | 1542.5 | 8.28 | 30.4 |
| B4 | -96.70  | 1.53 | 993.9  | 6.54 | 17.1 |
| B5 | -35.29  | 1.77 | 1458.4 | 8.23 | 29.8 |
| B6 | -90.57  | 1.53 | 1097.4 | 7.05 | 19.9 |
| B7 | -26.67  | 1.83 | 1762.9 | 8.79 | 34.6 |
| B8 | -3.56   | 1.95 | 1857.8 | 9.54 | 42.3 |
| C1 | -82.76  | 1.61 | 2994.5 | 8.24 | 28.1 |
| C2 | -44.26  | 1.72 | 2742.4 | 9.31 | 37.4 |
| C3 | -16.46  | 1.87 | 2817.4 | 10.1 | 46.7 |
| C4 | -74.32  | 1.61 | 2692.5 | 8.87 | 32.6 |
| C5 | -20.51  | 1.83 | 2602.2 | 9.96 | 44.5 |
| C6 | -71.36  | 1.60 | 2562.4 | 9.14 | 34.4 |
| C7 | -15.51  | 1.87 | 2624.1 | 10.0 | 45.6 |
| C8 | 5.32    | 2.00 | 2382.1 | 10.4 | 51.1 |
| D1 | -70.59  | 1.66 | 1560.6 | 7.15 | 21.6 |
| D2 | -33.90  | 1.76 | 1502.6 | 8.14 | 29.0 |
| D3 | -6.56   | 1.92 | 1636.2 | 9.01 | 37.4 |
| D4 | -60.87  | 1.67 | 1124.1 | 7.23 | 22.1 |
| D5 | -11.68  | 1.86 | 1533.7 | 8.83 | 35.3 |
| D6 | -44.14  | 1.64 | 1280.6 | 7.55 | 23.9 |
| D7 | -8.84   | 1.93 | 1902.6 | 9.46 | 41.4 |
| D8 | 10.62   | 2.01 | 1580.8 | 9.38 | 41.6 |
| E1 | -118.52 | 1.51 | 1166.0 | 5.89 | 13.8 |
| E2 | -77.42  | 1.60 | 1341.3 | 7.08 | 20.7 |
| E3 | -50.00  | 1.73 | 1457.1 | 7.83 | 26.5 |
| E4 | -114.29 | 1.48 | 865.3  | 6.21 | 15.1 |
| E5 | -50.35  | 1.70 | 1390.4 | 7.80 | 26.1 |
| E6 | -106.19 | 1.49 | 976.2  | 6.73 | 17.8 |
| E7 | -38.50  | 1.77 | 1702.9 | 8.43 | 31.2 |
| E8 | -13.79  | 1.90 | 1790.5 | 9.20 | 38.8 |
| F1 | -112.15 | 1.55 | 1258.8 | 6.03 | 14.7 |
| F2 | -71.54  | 1.63 | 1418.4 | 7.21 | 21.7 |

|     |         |      |        |      |      |
|-----|---------|------|--------|------|------|
| F3  | -44.09  | 1.77 | 1541.1 | 7.99 | 28.0 |
| F4  | -107.22 | 1.52 | 1009.9 | 6.33 | 16.0 |
| F5  | -45.07  | 1.73 | 1474.3 | 7.95 | 27.4 |
| F6  | -100.00 | 1.52 | 1102.6 | 6.83 | 18.6 |
| F7  | -34.41  | 1.79 | 1761.5 | 8.53 | 32.1 |
| F8  | -10.39  | 1.92 | 1838.9 | 9.29 | 39.7 |
| G1  | -80.73  | 1.61 | 1327.7 | 6.87 | 19.5 |
| G2  | -44.80  | 1.70 | 1473.4 | 7.98 | 27.3 |
| G3  | -18.60  | 1.84 | 1573.3 | 8.75 | 34.4 |
| G4  | -72.73  | 1.59 | 1108.8 | 7.23 | 21.5 |
| G5  | -22.22  | 1.81 | 1503.2 | 8.68 | 33.5 |
| G6  | -52.63  | 1.59 | 1163.0 | 7.60 | 23.7 |
| G7  | -17.02  | 1.84 | 1806.8 | 9.09 | 37.1 |
| G8  | 3.43    | 1.97 | 1760.2 | 9.61 | 43.2 |
| H1  | -74.07  | 1.64 | 1465.9 | 7.04 | 20.7 |
| H2  | -38.71  | 1.73 | 1594.2 | 8.17 | 28.9 |
| H3  | -12.50  | 1.86 | 1734.2 | 8.95 | 36.2 |
| H4  | -47.06  | 1.63 | 1254.0 | 7.31 | 22.3 |
| H5  | -16.78  | 1.85 | 1766.1 | 9.11 | 37.4 |
| H6  | -63.72  | 1.61 | 1345.5 | 7.73 | 24.7 |
| H7  | -12.83  | 1.86 | 1867.5 | 9.18 | 38.1 |
| H8  | 6.90    | 1.99 | 1725.3 | 9.55 | 42.9 |
| RDX | -21.6   | 1.82 | 1590.7 | 8.75 | 34.0 |
| HMX | -21.6   | 1.91 | 1633.9 | 9.10 | 39.0 |

**Table 5. Bond dissociation energies (BDE, kJ mol<sup>-1</sup>) for the weakest bonds of the designed compounds.**

| Compd. | ring-R |       | C-C/C=C(bridge) |       | C-N(bridge) |     | C-O(bridge) |     | N-N/N=N(bridge) |     | NH-NH <sub>2</sub> /NH-NO <sub>2</sub> /C-NO <sub>2</sub> |       |
|--------|--------|-------|-----------------|-------|-------------|-----|-------------|-----|-----------------|-----|-----------------------------------------------------------|-------|
|        | BO     | BDE   | BO              | BDE   | BO          | BDE | BO          | BDE | BO              | BDE | BO                                                        | BDE   |
| A1     | 1.0766 | 543.6 | 1.0557          | 509.8 | --          | --  | --          | --  | --              | --  | --                                                        | --    |
| A2     | 1.0840 | 345.6 | 1.0601          | 515.5 | --          | --  | --          | --  | --              | --  | --                                                        | --    |
| A3     | 0.8856 | 231.6 | 1.0514          | 488.0 | --          | --  | --          | --  | --              | --  | --                                                        | --    |
| A4     | 1.1931 | 472.0 | 1.0756          | 548.1 | --          | --  | --          | --  | --              | --  | --                                                        | --    |
| A5     | 1.1025 | 417.4 | 1.0689          | 544.7 | --          | --  | --          | --  | --              | --  | 0.9808                                                    | 117.4 |

|    |        |       |        |       |        |       |        |       |    |    |        |       |
|----|--------|-------|--------|-------|--------|-------|--------|-------|----|----|--------|-------|
| A6 | 1.1764 | 377.9 | 1.0750 | 543.8 | --     | --    | --     | --    | -- | -- | 1.0371 | 238.0 |
| A7 | 1.0083 | 444.0 | 1.0508 | 529.8 | --     | --    | --     | --    | -- | -- | 0.8292 | 133.5 |
| A8 | 1.0086 | 447.4 | 1.0485 | 501.4 | --     | --    | --     | --    | -- | -- | 0.8063 | 112.7 |
| B1 | 1.0763 | 550.6 | 1.0118 | 381.2 | --     | --    | --     | --    | -- | -- | --     | --    |
| B2 | 1.0819 | 344.8 | 1.0091 | 371.3 | --     | --    | --     | --    | -- | -- | --     | --    |
| B3 | 0.9172 | 257.0 | 1.0104 | 391.8 | --     | --    | --     | --    | -- | -- | --     | --    |
| B4 | 1.1243 | 450.1 | 1.0127 | 372.0 | --     | --    | --     | --    | -- | -- | --     | --    |
| B5 | 1.0184 | 414.2 | 1.0120 | 380.5 | --     | --    | --     | --    | -- | -- | 0.9605 | 112.3 |
| B6 | 1.1259 | 353.5 | 1.0022 | 397.3 | --     | --    | --     | --    | -- | -- | 1.0320 | 222.0 |
| B7 | 1.0153 | 454.9 | 1.0081 | 388.1 | --     | --    | --     | --    | -- | -- | 0.8379 | 118.8 |
| B8 | 1.0147 | 449.3 | 1.0069 | 375.2 | --     | --    | --     | --    | -- | -- | 0.8017 | 95.0  |
| C1 | 1.0426 | 463.7 | --     | --    | 1.0527 | 385.2 | --     | --    | -- | -- | --     | --    |
| C2 | 1.0789 | 363.9 | --     | --    | 1.0504 | 380.0 | --     | --    | -- | -- | --     | --    |
| C3 | 0.9066 | 235.8 | --     | --    | 1.0611 | 397.6 | --     | --    | -- | -- | --     | --    |
| C4 | 1.1127 | 451.9 | --     | --    | 1.0435 | 388.6 | --     | --    | -- | -- | --     | --    |
| C5 | 1.0362 | 419.4 | --     | --    | 1.0621 | 382.7 | --     | --    | -- | -- | 0.9844 | 116.1 |
| C6 | 1.0880 | 365.1 | --     | --    | 1.0581 | 374.9 | --     | --    | -- | -- | 0.0036 | 203.8 |
| C7 | 1.0153 | 432.8 | --     | --    | 1.0397 | 387.6 | --     | --    | -- | -- | 0.8167 | 109.0 |
| C8 | 1.0153 | 440.7 | --     | --    | 1.0686 | 390.3 | --     | --    | -- | -- | 0.7886 | 99.1  |
| D1 | 1.0477 | 454.0 | --     | --    | --     | --    | 0.9444 | 314.1 | -- | -- | --     | --    |
| D2 | 1.0906 | 355.5 | --     | --    | --     | --    | 0.9438 | 308.7 | -- | -- | --     | --    |
| D3 | 0.9140 | 244.4 | --     | --    | --     | --    | 0.9567 | 320.9 | -- | -- | --     | --    |
| D4 | 1.1496 | 456.6 | --     | --    | --     | --    | 0.9318 | 295.0 | -- | -- | --     | --    |
| D5 | 1.0460 | 413.2 | --     | --    | --     | --    | 0.9550 | 309.2 | -- | -- | 0.9484 | 107.8 |
| D6 | 1.1011 | 350.4 | --     | --    | --     | --    | 0.9483 | 296.0 | -- | -- | 1.0266 | 206.6 |
| D7 | 1.0057 | 296.2 | --     | --    | --     | --    | 0.9686 | 164.7 | -- | -- | 0.8183 | 136.7 |
| D8 | 1.0120 | 452.8 | --     | --    | --     | --    | 0.9476 | 314.3 | -- | -- | 0.8050 | 108.8 |
| E1 | 1.0785 | 551.7 | 1.0119 | 249.5 | --     | --    | --     | --    | -- | -- | --     | --    |
| E2 | 1.0799 | 361.8 | 1.0125 | 248.7 | --     | --    | --     | --    | -- | -- | --     | --    |
| E3 | 0.9186 | 255.1 | 1.0072 | 253.3 | --     | --    | --     | --    | -- | -- | --     | --    |
| E4 | 1.1312 | 449.4 | 1.0121 | 247.6 | --     | --    | --     | --    | -- | -- | --     | --    |
| E5 | 1.0296 | 418.7 | 1.0098 | 257.5 | --     | --    | --     | --    | -- | -- | 0.9682 | 111.7 |
| E6 | 1.0908 | 351.8 | 1.0102 | 249.1 | --     | --    | --     | --    | -- | -- | 1.0251 | 207.4 |
| E7 | 1.0104 | 440.6 | 1.0100 | 255.8 | --     | --    | --     | --    | -- | -- | 0.8287 | 122.2 |
| E8 | 1.0142 | 455.5 | 1.0069 | 257.2 | --     | --    | --     | --    | -- | -- | 0.8073 | 104.9 |
| F1 | 1.0789 | 550.0 | 1.0928 | 500.6 | --     | --    | --     | --    | -- | -- | --     | --    |
| F2 | 1.0859 | 362.7 | 1.0956 | 504.9 | --     | --    | --     | --    | -- | -- | --     | --    |
| F3 | 0.9155 | 251.1 | 1.0884 | 501.0 | --     | --    | --     | --    | -- | -- | --     | --    |
| F4 | 1.1369 | 450.8 | 1.0988 | 500.8 | --     | --    | --     | --    | -- | -- | --     | --    |
| F5 | 1.0350 | 415.7 | 1.0885 | 496.0 | --     | --    | --     | --    | -- | -- | 0.9614 | 108.4 |
| F6 | 1.1048 | 352.6 | 0.0086 | 499.9 | --     | --    | --     | --    | -- | -- | 1.0283 | 207.2 |
| F7 | 1.0102 | 436.3 | 1.0880 | 496.5 | --     | --    | --     | --    | -- | -- | 0.8287 | 120.6 |

|    |        |       |        |       |        |       |    |    |        |       |        |       |
|----|--------|-------|--------|-------|--------|-------|----|----|--------|-------|--------|-------|
| F8 | 1.0147 | 450.2 | 1.0840 | 232.7 | --     | --    | -- | -- | --     | --    | 0.8037 | 104.0 |
| G1 | 1.0848 | 554.4 | --     | --    | 1.0996 | 346.3 | -- | -- | 1.0292 | 185.0 | --     | --    |
| G2 | 1.0755 | 362.8 | --     | --    | 1.0872 | 340.8 | -- | -- | 1.0258 | 165.3 | --     | --    |
| G3 | 0.9347 | 267.5 | --     | --    | 1.1348 | 360.2 | -- | -- | 0.0002 | 207.2 | --     | --    |
| G4 | 1.1172 | 439.8 | --     | --    | 1.0973 | 329.4 | -- | -- | 1.0000 | 148.7 | --     | --    |
| G5 | 1.0348 | 425.3 | --     | --    | 1.1061 | 346.0 | -- | -- | 1.0279 | 189.2 | 0.9978 | 102.8 |
| G6 | 1.0991 | 358.0 | --     | --    | 1.0919 | 340.2 | -- | -- | 1.0232 | 160.8 | 1.0277 | 203.5 |
| G7 | 1.0152 | 415.2 | --     | --    | 1.1159 | 321.0 | -- | -- | 1.0003 | 169.9 | 0.8413 | 69.5  |
| G8 | 1.0224 | 453.2 | --     | --    | 1.1360 | 339.0 | -- | -- | 1.0000 | 195.0 | 0.7895 | 78.0  |
| H1 | 1.0760 | 546.3 | --     | --    | 1.1016 | 275.6 | -- | -- | 1.7788 | 885.0 | --     | --    |
| H2 | 1.1020 | 360.6 | --     | --    | 1.1105 | 277.3 | -- | -- | 1.7613 | 263.9 | --     | --    |
| H3 | 0.9066 | 237.4 | --     | --    | 1.0766 | 264.9 | -- | -- | 1.8295 | 387.2 | --     | --    |
| H4 | 1.1832 | 467.8 | --     | --    | 1.1312 | 295.4 | -- | -- | 1.7212 | 833.4 | --     | --    |
| H5 | 1.0859 | 195.0 | --     | --    | 1.1178 | 79.5  | -- | -- | 1.7272 | 413.4 | 0.9975 | 155.1 |
| H6 | 1.1192 | 354.1 | --     | --    | 1.0880 | 271.4 | -- | -- | 1.7973 | 473.7 | 1.0279 | 219.2 |
| H7 | 1.0078 | 443.3 | --     | --    | 1.1015 | 284.8 | -- | -- | 1.7736 | 326.3 | 0.8293 | 121.0 |
| H8 | 1.0109 | 454.8 | --     | --    | 1.0892 | 275.4 | -- | -- | 1.7932 | 308.8 | 0.8051 | 108.8 |

## Reference

1. M. J. Frisch, G. W. Trucks, H. B. Schlegel, et al, Gaussian 03, Gaussian Inc, Pittsburgh, PA, **2003**.
2. Y. Pan, J. S. Li, B. B. Cheng, W. H. Zhu, H. M. Xiao, *Comput. Theor. Chem.*, **2012**, *992*, 110-119.
3. V. D. Ghule, R. Sarangapani, P. M. Jadhav, S. P. Tewari, *J. Mol. Model.*, **2011**, *17*, 1507-1515.
4. D. Srinivas, V. D. Ghule, K. Muralidharan, H. D. B. Jenkins, *Chem. Asian J.*, **2013**, *8*, 1023-1028.
5. W. H. Zhu, C. C. Zhang, T. Wei, H. M. Xiao. *Struct. Chem.*, **2011**, *22*, 149-159.
6. P. W. Atkins, Physical chemistry, 2nd edn. Oxford University Press: Oxford, **1982**.
7. P. Politzer, Y. Ma, P. Lane, M. C. Concha, *Int. J. Quantum Chem.*, **2005**, *105*, 341-347.
8. E. F. C. Byrd, B. M. Rice, *J. Phys. Chem. A*, **2006**, *110*, 1005-1013.
9. M. J. Kamlet, S. J. Jacobs, *J. Chem. Phys.*, **1968**, *48*, 1968, 23-25.
10. P. Politzer, J. Martinez, J. S. Murray, M. C. Concha, A. Toro-Labbé, *Mol. Phys.*, **2009**, *107*, 2095-2101.
